# Supplementary material for: Optimizing Livers for Transplantation Using Machine Perfusion versus Cold Storage in Large Animal Studies and Human Studies: A Systematic Review and Meta-Analysis
Source: Hindawi journal article supplement (doi:10.1155/2018/9180757), 2018-09-05
Supplement: f1 [file 9180757.f1.pdf]

## Supplementary materials

### Supplementary 1. Subgroup analysis of peak AST in SNMP in animal studies

| Subgroup          | No. of studies | Subtotal SMD(95%CI) | I <sup>2</sup> value | P value |
|-------------------|----------------|---------------------|----------------------|---------|
| <b>WIT</b>        |                |                     |                      |         |
| NR                | 2              | -0.61(-1.40,0.18)   | 0.0%                 | 0.133   |
| 30-60min          | 2              | -0.68(-3.28,1.92)   | 86.3%                | 0.610   |
| <b>Donor type</b> |                |                     |                      |         |
| HBD               | 1              | -0.46(-1.72,0.80)   | --                   | 0.474   |
| DCD               | 3              | -0.67(-2.04,0.70)   | 72.9%                | 0.339   |

### Supplementary 2. Subgroup analysis of animal survival in NMP in animal studies

| Subgroup          | No. of studies | Subtotal RR(95%CI)   | I <sup>2</sup> value | P value |
|-------------------|----------------|----------------------|----------------------|---------|
| <b>WIT</b>        |                |                      |                      |         |
| NR                | 1              | 1.000(0.538,1.859)   | --                   | 1.000   |
| 0min              | 2              | 1.581(0.450,5.555)   | 71.6%                | 0.475   |
| 0-30min           | 1              | 1.182(0.763,1.831)   | --                   | 0.455   |
| 30-60min          | 1              | 7.857(0.551,112.089) | --                   | 0.128   |
| <b>Donor type</b> |                |                      |                      |         |
| HBD               | 3              | 1.225(0.670,2.240)   | 47.2%                | 0.510   |
| DCD               | 2              | 2.539(0.136,47.501)  | 79.6%                | 0.533   |

### Supplementary 3. Subgroup analysis of animal survival in HMP in animal studies

| Subgroup   | No. of studies | Subtotal RR(95%CI)   | I <sup>2</sup> value | P value |
|------------|----------------|----------------------|----------------------|---------|
| <b>WIT</b> |                |                      |                      |         |
| NR         | 2              | 0.388(0.128,1.178)   | 0.0%                 | 0.095   |
| 0-30min    | 1              | 10.50(0.698,157.908) | --                   | 0.086   |

### Supplementary 4. Subgroup analysis of EAD in NMP in human studies

| Subgroup          | No. of studies | Subtotal RR(95%CI) | I <sup>2</sup> value | P value |
|-------------------|----------------|--------------------|----------------------|---------|
| <b>Donor type</b> |                |                    |                      |         |
| DCD               | 1              | 0.677(0.203,2.194) | --                   | 0.505   |
| DCD/DBD           | 2              | 0.788(0.143,4.354) | 90.9%                | 0.784   |

### Supplementary 5. Subgroup analysis of graft survival in HMP in human studies

| Subgroup          | No. of studies | Subtotal RR(95%CI)  | I <sup>2</sup> value | P value |
|-------------------|----------------|---------------------|----------------------|---------|
| <b>WIT</b>        |                |                     |                      |         |
| NR                | 2              | 1.003(0.856,1.176)  | 0.0%                 | 0.968   |
| 0-30min           | 1              | 1.743(1.157,2.265)  | --                   | 0.008   |
| 30-60min          | 2              | 1.111(0.792,1.558)  | 86.3%                | 0.542   |
| <b>Donor type</b> |                |                     |                      |         |
| DCD               | 2              | 1.288 (0.716,2.314) | 84.8%                | 0.398   |
| ECD               | 1              | 1.008(0.786,1.292)  | --                   | 0.949   |

|         |   |                    |       |       |
|---------|---|--------------------|-------|-------|
| DCD/DBD | 2 | 1.111(0.792,1.558) | 86.3% | 0.542 |
|---------|---|--------------------|-------|-------|

**Supplementary 6. Meta- analysis of hospital stay, ICU stay, peak AST and INR in human studies**

| Subgroup             | No. of studies | Subtotal SMD(95%CI)      | I <sup>2</sup> value | P value |
|----------------------|----------------|--------------------------|----------------------|---------|
| <b>Hospital stay</b> |                |                          |                      |         |
| NMP                  | 3              | 0.338 (-0.286 to 0.963)  | 60.9%                | 0.288   |
| HMP                  | 5              | -0.088 (-0.662 to 0.485) | 80.6%                | 0.762   |
| <b>ICU stay</b>      |                |                          |                      |         |
| NMP                  | 3              | 0.563(-0.330 to 1.457)   | 80.0%                | 0.217   |
| HMP                  | 3              | 0.307 (-0.004 to 0.619)  | 0.0%                 | 0.053   |
| <b>Peak AST</b>      |                |                          |                      |         |
| NMP                  | 3              | -4.616(-10.364 to 1.133) | 99.3%                | 0.116   |
| HMP                  | 3              | -1.235(-3.333 to 0.863)  | 97.0%                | 0.249   |
| <b>INR</b>           |                |                          |                      |         |
| NMP                  | 4              | 0.083(-0.133 to 0.299)   | 0.0%                 | 0.453   |
| HMP                  | 3              | -0.594(-2.683 to 1.495)  | 97.3%                | 0.577   |

**Supplementary 7. Publication bias in all studies using Begg's test**

| Subgroup                    | No. of studies | P-Q | Std. Dev. of Score | P value |
|-----------------------------|----------------|-----|--------------------|---------|
| <b>Peak AST(animal)</b>     |                |     |                    |         |
| NMP                         | 2              | -1  | 1.00               | 0.317   |
| SNMP                        | 4              | 0   | 2.94               | 1.000   |
| HMP                         | 2              | 1   | 1.00               | 0.317   |
| <b>HA</b>                   |                |     |                    |         |
| NMP                         | 2              | -1  | 1.00               | 0.317   |
| HMP                         | 2              | -1  | 1.00               | 0.317   |
| <b>Animal survival</b>      |                |     |                    |         |
| NMP                         | 5              | 3   | 4.08               | 0.463   |
| SNMP                        | 4              | 4   | 2.94               | 0.174   |
| HMP                         | 3              | 3   | 1.91               | 0.117   |
| <b>Biliary complication</b> |                |     |                    |         |
| NMP                         | 4              | 2   | 2.94               | 0.497   |
| HMP                         | 5              | -2  | 4.08               | 0.624   |
| <b>EAD</b>                  |                |     |                    |         |
| NMP                         | 3              | 1   | 1.91               | 0.602   |
| HMP                         | 4              | 0   | 2.94               | 1.000   |
| <b>PNF</b>                  |                |     |                    |         |
| NMP                         | 1              | --  | --                 | --      |
| HMP                         | 2              | -1  | 1.00               | 0.317   |
| <b>Graft survival</b>       |                |     |                    |         |
| NMP                         | 2              | 1   | 1.00               | 0.317   |
| HMP                         | 5              | 8   | 4.08               | 0.050   |
| <b>Hospital stay</b>        |                |     |                    |         |
| NMP                         | 3              | 1   | 1.91               | 0.602   |

---

|                        |   |    |      |       |
|------------------------|---|----|------|-------|
| HMP                    | 5 | -4 | 4.08 | 0.327 |
| <b>ICU stay</b>        |   |    |      |       |
| NMP                    | 3 | 3  | 1.91 | 0.117 |
| HMP                    | 3 | 3  | 1.91 | 0.117 |
| <b>Peak AST(human)</b> |   |    |      |       |
| NMP                    | 3 | -3 | 1.91 | 0.117 |
| HMP                    | 3 | -1 | 1.91 | 0.602 |
| <b>INR</b>             |   |    |      |       |
| NMP                    | 4 | 4  | 2.94 | 0.174 |
| HMP                    | 3 | -1 | 1.91 | 0.602 |

---
